# Supplementary material
Source: Elsevier journal article supplement (https://www.sciencedirect.com/science/article/pii/S0213911119300366)
Supplement: mmc1 [file S0213911119300366:mmc1.docx]

**Apéndice**

**Tabla I**

Revistas españolas incluidas en JCR 2017 que fueron incluidas y excluidas en el análisis

| **Revista** | **ISSN** | **Decisión** | **Motivo** |
| --- | --- | --- | --- |
| Rev Esp Cardiol | 0300-8932 | Incluir | Trabajos publicados (revisión sistemática) |
| Int J Clin Hlth Psyc | 1697-2600 | Excluir | Ámbito internacional |
| Emergencias | 1137-6821 | Incluir | Trabajos publicados (revisión sistemática) |
| Eur J Psychol Appl L | 1889-1861 | Excluir | Ámbito internacional |
| J Invest Allerg Clin | 1018-9068 | Excluir | Trabajos publicados (búsqueda complementaria) |
| Comunicar | 1134-3478 | Excluir | Área temática |
| Aids Rev | 1139-6121 | Excluir | Trabajos publicados (búsqueda complementaria) |
| Arch Bronconeumol | 0300-2896 | Incluir | Trabajos publicados (revisión sistemática) |
| Brq-Bus Res Q | 2340-9436 | Excluir | Área temática |
| Clin Transl Oncol | 1699-048X | Incluir | Trabajos publicados |
| Rev Psiquiatr Salud | 1888-9891 | Incluir | Trabajos publicados |
| Rev Psicodidact | 1136-1034 | Excluir | Área temática |
| Adicciones | 0214-4840 | Incluir | Trabajos publicados |
| Histol Histopathol | 0213-3911 | Excluir | Trabajos publicados (búsqueda complementaria) |
| Neurologia | 0213-4853 | Incluir | Trabajos publicados |
| Mater Construcc | 0465-2746 | Excluir | Área temática |
| Rev Educ | 0034-8082 | Excluir | Área temática |
| Med Intensiva | 0210-5691 | Incluir | Trabajos publicados (revisión sistemática) |
| Enferm Infec Microbiol Clin | 0213-005X | Incluir | Trabajos publicados (revisión sistemática) |
| Med Oral Patol Oral | 1698-6946 | Incluir | Trabajos publicados |
| Allergol Immunopath | 0301-0546 | Excluir | Trabajos publicados (búsqueda complementaria) |
| Rev Esp Enferm Dig | 1130-0108 | Incluir | Trabajos publicados |
| Gac Sanit | 0213-9111 | Incluir | Trabajos publicados (revisión sistemática) |
| Int J Dev Biol | 0214-6282 | Excluir | Área temática |
| Psychosoc Interv | 1132-0559 | Excluir | Área temática |
| Psicothema | 0214-9915 | Excluir | Área temática |
| Sort-Stat Oper Res T | 1696-2281 | Excluir | Área temática |
| Drug Today | 1699-3993 | Excluir | Trabajos publicados (búsqueda complementaria) |
| Educ Xx1 | 1139-613X | Excluir | Área temática |
| An Pediatr | 1695-4033 | Incluir | Trabajos publicados (revisión sistemática) |
| Prof Inform | 1386-6710 | Excluir | Área temática |
| J Iber Geol | 1698-6180 | Excluir | Área temática |
| Eur J Philos Sci | 1879-4912 | Excluir | Área temática |
| Endocrinol Nutr | 1575-0922 | Incluir | Trabajos publicados |
| Actas Urol Esp | 0210-4806 | Incluir | Trabajos publicados |
| Rev Esp Med Nucl Ima | 2253-654X | Excluir | Trabajos publicados (búsqueda complementaria) |
| Ardeola | 0570-7358 | Excluir | Área temática |
| J Work Organ Psychol | 1576-5962 | Excluir | Área temática |
| Rev Clin Esp | 0014-2565 | Incluir | Trabajos publicados (revisión sistemática) |
| Sci Mar | 0214-8358 | Excluir | Área temática |
| Test-Spain | 1133-0686 | Excluir | Área temática |
| Med Clin-Barcelona | 0025-7753 | Incluir | Trabajos publicados (revisión sistemática) |
| Nefrologia | 0211-6995 | Incluir | Trabajos publicados (revisión sistemática) |
| Aten Prim | 0212-6567 | Incluir | Trabajos publicados (revisión sistemática) |
| Top | 1134-5764 | Excluir | Área temática |
| Gastroent Hepat-Barc | 0210-5705 | Incluir | Trabajos publicados (revisión sistemática) |
| Racsam Rev R Acad A | 1578-7303 | Excluir | Área temática |
| Rev Mat Complut | 1139-1138 | Excluir | Área temática |
| Rev Mat Iberoam | 0213-2230 | Excluir | Área temática |
| Collect Math | 0010-0757 | Excluir | Área temática |
| Rev Esp Derecho Cons | 0211-5743 | Excluir | Área temática |
| Publ Mat | 0214-1493 | Excluir | Área temática |
| Rev Iberoam Micol | 1130-1406 | Excluir | Área temática |
| Forest Syst | 2171-5068 | Excluir | Área temática |
| Rev Psicol Deporte | 1132-239X | Excluir | Área temática |
| Behav Psychol | 1132-9483 | Excluir | Área temática |
| Anim Biodiv Conserv | 1578-665X | Excluir | Área temática |
| Rev Contab | 1138-4891 | Excluir | Área temática |
| Actas Esp Psiquiatri | 1139-9287 | Incluir | Trabajos publicados |
| Nutr Hosp | 0212-1611 | Excluir | Trabajos publicados |
| Cir Espan | 0009-739X | Incluir | Trabajos publicados |
| Span J Agric Res | 1695-971X | Excluir | Área temática |
| Int Microbiol | 1139-6709 | Excluir | Ámbito internacional |
| An Psicol-Spain | 0212-9728 | Excluir | Área temática |
| Rev Esp Investig Soc | 0210-5233 | Excluir | Área temática |
| Limnetica | 0213-8409 | Excluir | Área temática |
| Scripta Nova | 1138-9788 | Excluir | Área temática |
| Iberica | 1139-7241 | Excluir | Área temática |
| Geol Acta | 1695-6133 | Excluir | Área temática |
| Rev Int Med Cienc Ac | 1577-0354 | Excluir | Área temática |
| Ensen Cienc | 0212-4521 | Excluir | Área temática |
| World Rabbit Sci | 1257-5011 | Excluir | Área temática |
| Estud Geol-Madrid | 0367-0449 | Excluir | Área temática |
| Rev Esp Salud Public | 1135-5727 | Incluir | Trabajos publicados (revisión sistemática) |
| Rev Esp Doc Cient | 0210-0614 | Excluir | Área temática |
| Span J Psychol | 1138-7416 | Excluir | Área temática |
| An Sist Sanit Navar | 1137-6627 | Incluir | Trabajos publicados |
| Rev Esp Quimioterap | 0214-3429 | Incluir | Trabajos publicados |
| Rev Int Sociol | 0034-9712 | Excluir | Área temática |
| Rev Neurologia | 0210-0010 | Incluir | Trabajos publicados |
| Grasas Aceites | 0017-3495 | Excluir | Área temática |
| Psicologica | 0211-2159 | Excluir | Área temática |
| Rev Esp Pedagog | 0034-9461 | Excluir | Área temática |
| Inf Constr | 0020-0883 | Excluir | Área temática |
| Dyna-Bilbao | 0012-7361 | Excluir | Área temática |
| An Jardin Bot Madrid | 0211-1322 | Excluir | Área temática |
| Rev Iberoam Autom In | 1697-7912 | Excluir | Área temática |
| Arch Esp Urol | 0004-0614 | Incluir | Trabajos publicados |
| Porta Linguarum | 1697-7467 | Excluir | Área temática |
| Rev Hist Econ | 0212-6109 | Excluir | Área temática |
| Trabajos Prehist | 0082-5638 | Excluir | Área temática |
| Vial-Vigo Int J Appl | 1697-0381 | Excluir | Área temática |
| Rev Econ Mund | 1576-0162 | Excluir | Área temática |
| Rev Metal Madrid | 0034-8570 | Excluir | Área temática |
| Hist Agrar | 1139-1472 | Excluir | Área temática |
| Eur J Psychiat | 0213-6163 | Excluir | Ámbito internacional |
| Span J Financ Accoun | 0210-2412 | Excluir | Área temática |
| Rev Int Metod Numer | 0213-1315 | Excluir | Área temática |
| B Asoc Geogr Esp | 0212-9426 | Excluir | Área temática |
| Clin Salud | 1130-5274 | Excluir | Trabajos publicados (búsqueda complementaria) |
| Dynamis | 0211-9536 | Excluir | Área temática |
| Hist Polit | 1575-0361 | Excluir | Área temática |
| Neurocirugia | 1130-1473 | Incluir | Trabajos publicados |
| Lazaroa | 0210-9778 | Excluir | Área temática |
| Itea-Inf Tec Econ Ag | 1699-6887 | Excluir | Área temática |
| Aibr-Rev Antropol Ib | 1695-9752 | Excluir | Área temática |
| Rev Estud Polit | 0048-7694 | Excluir | Área temática |
| Ayer | 1134-2277 | Excluir | Área temática |
| Rev Hist Indust | 1132-7200 | Excluir | Área temática |
| Shilap-Rev Lepidopt | 0300-5267 | Excluir | Área temática |
| Afinidad | 0001-9704 | Excluir | Área temática |
| Rilce-Rev Filol Hisp | 0213-2370 | Excluir | Área temática |
| Drug Future | 0377-8282 | Excluir | Trabajos publicados (búsqueda complementaria) |
| Hacienda Publica Esp | 0210-1173 | Excluir | Área temática |
| Circ Linguist Apl Co | 1576-4737 | Excluir | Área temática |
| Rev Econ Apl-Spain | 1133-455X | Excluir | Área temática |
| Rev Int Androl | 1698-031X | Excluir | Trabajos publicados (búsqueda complementaria) |
| Sintagma | 0214-9141 | Excluir | Área temática |
| Atlantis-Spain | 0210-6124 | Excluir | Área temática |
| Endocrinol Diab Nutr | 2530-0180 | Excluir | Trabajos publicados |

| Nota aclaratoria sobre la selección de las revistas:  Un experto en recuperación de información y búsquedas (A. Alonso-Arroyo, doctor en Biblioteconomía) llevó a cabo una búsqueda de revistas españolas incluidas en el *Journal Citation Reports* (JCR) de 2017 (Clarivate Analytics, Filadelfia, EE.UU.), en sus dos ediciones: “Ciencia (SCIE)” y “Ciencias Sociales (SSCI)”, publicadas en junio de 2018.  La estrategia de búsqueda utilizada fue: *“Selected JCR Year: 2017 Selected Editions: SCIE,SSCI Selected Countries/Regions: 'SPAIN' Selected Category Scheme: WoS”.* Los resultados de esta búsqueda fueron revisados por dos investigadores (M. Ridao y F. Catalá-López) de manera independiente.  Posteriormente, dos investigadores (M. Ridao y F. Catalá-López, ambos con experiencia en revisiones sistemáticas, investigación en servicios sanitarios y economía de la salud) seleccionaron una muestra de revistas biomédicas editadas en España que cumplieran los criterios de elegibilidad. Para ello, las revistas debían estar incluidas en el JCR 2017 y publicar trabajos originales relacionados con cualquier aspecto de la investigación clínica, la investigación en servicios de salud, la economía de la salud, la epidemiología, la salud pública o cualquier área relacionada. Fueron excluidas aquellas revistas que indicaran explícitamente que no publicaban evaluaciones económicas o se comprobara que no publicaban este tipo de estudios a partir de la información de una revisión sistemática de la literatura publicada con anterioridad1. En caso de duda, realizaron búsquedas complementarias (exploratorias) para conocer el tipo de artículos que publican algunas de las revistas incluidas en el JCR, con las que no están familiarizados, antes de su exclusión.  1Catalá-López F, Ridao M, Alonso-Arroyo A, et al. The quality of reporting methods and results of cost-effectiveness analyses in Spain: a methodological systematic review. Syst Rev. 2016;5:6. |
| --- |
| **Diagrama de flujo de selección de revistas** |

**Tabla II**

Características descriptivas y apoyo a guías de publicación en las normas de autoría de las revistas

| **Revista** | **Factor de impacto (cuartil) JCR 2017** | **Apoyo a la declaración CHEERS** | **Apoyo a alguna guía de publicación de estudios de evaluación económica** | **Apoyo a alguna guía de publicación** | **Editorial** |
| --- | --- | --- | --- | --- | --- |
| Actas Esp Psiquiatr | 0,878 (Q4) | No | No | No | Fundación López-Ibor |
| Actas Urol Esp | 1,260 (Q4) | No | No | Sí (CONSORT, STROBE, PRISMA, ARRIVE) | Elsevier |
| Adicciones | 2,021 (Q3) | No | No | Sí (CONSORT, TREND) | Socidrogalcohol |
| An Pediatr (Barc) | 1,318 (Q3) | No | No | Sí (otras) | Elsevier |
| An Sist Sanit Navar | 0,622 (Q4) | No | No | No | Departamento de Salud, Gobierno de Navarra |
| Arch Bronconeumol | 2.644 (Q2) | No | No | Sí (CONSORT, STROBE, STARD, PRISMA, ARRIVE) | Elsevier |
| Arch Esp Urol | 0,465 (Q4) | No | No | No | Iniestares S.A.U |
| Aten Primar | 1,148 (Q3) | No | No | Sí (CONSORT, PRISMA, ARRIVE) | Elsevier |
| Cir Esp | 0,841 (Q4) | No | No | Sí (CONSORT, STARD, PRISMA, ARRIVE) | Elsevier |
| Clin Transl Oncol | 2,392 (Q3) | No | No | Sí (CONSORT) | Springer |
| Emergencias | 3,608 (Q1) | No | No | Sí (CONSORT, STARD, STROBE, TRIPOD, PRISMA, AGREE, CARE, SAMPL) | Grupo SANED |
| Endocrinol Nutr | 1,268 (Q4) | No | No | Sí (CONSORT, STROBE, PRISMA, CARE) | Elsevier |
| Enferm Infecc Microbiol Clin | 1,707 (Q4) | No | No | Sí (CONSORT, ARRIVE) | Elsevier |
| Gac Sanit | 1,581 (Q3) | No | No | Sí (CONSORT, STROBE, STARD, QUOROM, PRISMA/PRISMA-E) | Elsevier/SESPAS |
| Gastroenterol Hepatol | 1,078 (Q4) | No | No | Sí (CONSORT, ARRIVE, AGREE) | Elsevier |
| Med Clin (Barc) | 1,168 (Q3) | No | No | Sí (CONSORT, ARRIVE, AGREE) | Elsevier |
| Med Intensiva | 1,755 (Q4) | No | No | Sí (CONSORT, PRISMA, STARD) | Elsevier |
| Med Oral Patol Oral Cir Bucal | 1,671 (Q2) | No | No | No | Medicina Oral S.L. |
| Nefrología | 1,167 (Q4) | No | No | Sí (CONSORT, ARRIVE) | Elsevier |
| Neurocirugía (Astur) | 0,310 (Q4) | No | No | Sí (CONSORT, ARRIVE) | Elsevier |
| Neurología | 1,938 (Q3) | No | No | Sí (CONSORT, ARRIVE) | Elsevier |
| Rev Clin Esp | 1,000 (Q3) | No | No | Sí (CONSORT, STARD, STROBE, PRISMA, COREQ, SQUIRE, ARRIVE) | Elsevier |
| Rev Neurol | 0,601 (Q4) | No | No | No | Viguera Editores S.L.U. |
| Rev Psiquiatr Salud Ment | 2,233 (Q2) | No | No | Sí (CONSORT, ARRIVE) | Elsevier |
| Rev Esp Cardiol | 5,166 (Q1) | No | No | Sí (CONSORT, ARRIVE) | Elsevier |
| Rev Esp Enferm Dig | 1,632 (Q4) | No | No | Sí (CONSORT, STROBE, STARD, PRISMA, CARE) | Arán Ediciones S.L. |
| Rev Esp Quimioterap | 0,605 (Q4) | No | No | Sí (ARRIVE) | Sociedad Española de Quimioterapia |
| Rev Esp Salud Pública | 0,690 (Q4) | Sí | Sí (CHEERS, enlace a la página web de la red EQUATOR) | Sí (CONSORT, STROBE, PRISMA, CHEERS, GATHER) | Ministerio de Sanidad, Consumo y Bienestar Social |

Nota: las revistas se presentan en orden alfabético.

**Tabla III**

Principales guías de publicación incluidas en las normas de las revistas revisadas

| **Guía** | **Diseño de investigación** | **Página web** | **Número (%)** | **Intervalo de confianza del 95%** |
| --- | --- | --- | --- | --- |
| CONSORT | Ensayos clínicos aleatorizados | www.consort-statement.org/ | 21 (75,0) | 55,1-89,3 |
| ARRIVE | Estudios preclínicos/animales | [www.nc3rs.org.uk/arrive-guidelines](http://www.nc3rs.org.uk/arrive-guidelines) | 14 (50,0) | 30,6 -69,3 |
| PRISMA | Revisiones sistemáticas/metaanálisis | www.prisma-statement.org/ | 11 (39,3) | 21,5-59,4 |
| STROBE | Estudios observacionales | www.strobe-statement.org/ | 8 (28,6) | 13,2-48,7 |
| STARD | Estudios de pruebas diagnósticas | www.equator-network.org/reporting-guidelines/stard/ | 7 (25,0) | 10,7-44,9 |
| AGREE | Guías de práctica clínica | www.agreetrust.org/resource-centre/agree-reporting-checklist/ | 3 (10,7) | 2,3-28,2 |
| CARE | Notificación de casos | [www.care-statement.org/](http://www.care-statement.org/) | 3 (10,7) | 2,3-28,2 |
| COREQ | Investigación cualitativa | www.equator-network.org/reporting-guidelines/coreq/ | 1 (3,6) | 0,1-18,3 |
| **CHEERS** | **Evaluación económica** | **www.equator-network.org/reporting-guidelines/cheers/** | **1 (3,6)** | **0,1-18,3** |
| GATHER | Estimaciones sanitarias | http://gather-statement.org/ | 1 (3,6) | 0,1-18,3 |
| QUOROM | Metaanálisis de ensayos clínicos | PRISMA reemplazó a QUOROM | 1 (3,6) | 0,1-18,3 |
| SAMPL | Estadística | www.equator-network.org/2013/02/11/sampl-guidelines-for-statistical-reporting/ | 1 (3,6) | 0,1-18,3 |
| SQUIRE | Estudios mejora de la calidad | www.squire-statement.org/ | 1 (3,6) | 0,1-18,3 |
| TREND | Estudios de intervención (conductual/salud pública) no aleatorizados | <https://www.cdc.gov/trendstatement/> | 1 (3,6) | 0,1-18,3 |
| TRIPOD | Estudios modelos predictivos/ pronóstico/diagnóstico | [www.tripod-statement.org/](http://www.tripod-statement.org/) | 1 (3,6) | 0,1-18,3 |

AGREE: *Appraisal of Guidelines for Research and Evaluation;* ARRIVE: *Animal Research: Reporting of In Vivo Experiments;* CARE: *CAse Report;* CHEERS: *Consolidated Health Economic Evaluation Reporting Standards;* CONSORT: *Consolidated Standards of Reporting Trials;* COREQ: *COnsolidated criteria for REporting Qualitative research;* GATHER: *Guidelines for Accurate and Transparent Health Estimates Reporting;* PRISMA: *Preferred Reporting Items for Systematic Reviews and Meta-Analyses;* QUOROM: *QUality Of RepOrting of Meta-analyses;* SAMPL: *Statistical Analyses and Methods in the Published Literature;* SQUIRE: *Standards for QUality Improvement Reporting Excellence;* STARD: *Standards for Reporting Diagnostic Accuracy;* STROBE: *STrengthening the Reporting of OBservational studies in Epidemiology;* TREND: *Transparent Reporting of Evaluations with Nonrandomized Designs;* TRIPOD: *Transparent Reporting of a multivariable prediction model for Individual Prognosis Or Diagnosis.*

**Tabla IV**

Ejemplo de lista de comprobación de la Declaración CHEERS traducida al español

| **Sección/ítem** | **Nº** | **Recomendación** | **Presentado en pág. nº, línea nº** |
| --- | --- | --- | --- |
| **Título y resumen** |  |  |  |
| Título | 1 | Identifique el estudio como una evaluación económica o utilice términos más específicos, como “análisis de coste-efectividad”, y describa las intervenciones comparadas. |  |
| Resumen | 2 | Facilite un resumen estructurado de los objetivos, perspectiva, contexto, métodos (incluyendo diseño del estudio y parámetros), resultados (incluyendo caso base y análisis de incertidumbre) y conclusiones. |  |
| **Introducción** |  |  |  |
| Antecedentes y objetivos | 3 | Facilite una descripción explícita del contexto general del estudio. Presente la pregunta de investigación y su relevancia para la política de salud o las decisiones en la práctica clínica. |  |
| **Métodos** |  |  |  |
| Población, objetivo y subgrupos | 4 | Describa las características de la población del caso base y de los subgrupos analizados, incluyendo el porqué de la elección. |  |
| Contexto y lugar | 5 | Consigne los aspectos relevantes del/los sistema/s donde la decisión debe ser tomada. |  |
| Perspectiva del estudio | 6 | Describa la perspectiva del estudio y relaciónela con los costes evaluados. |  |
| Comparadores | 7 | Describa las intervenciones o estrategias que se comparan e indiquen por qué fueron elegidas. |  |
| Horizonte temporal | 8 | Indique el/los horizonte/s temporal/es utilizado/s para evaluar los costos y las consecuencias, y explique por qué es/son apropiado/s. |  |
| Tasa de descuento | 9 | Presente la elección de tasa/s de descuento utilizada/s para costes y resultados en salud *(outcomes)* y explique por qué es/son apropiada/s. |  |
| Selección de resultados en salud | 10 | Describa qué resultados en salud *(outcomes)* se usaron como medida de beneficio en la evaluación y su relevancia para el tipo de análisis realizado. |  |
| Medición de efectividad | 11a | *Estimaciones basadas en un estudio único:* describa de forma completa las características del diseño del estudio y por qué dicho estudio fue una fuente suficiente de datos de efectividad clínica. |  |
|  | 11b | *Estimaciones basadas en síntesis de evidencia:* describa de forma completa los métodos usados para la identificación de los estudios incluidos, así como para la síntesis de los datos de efectividad clínica. |  |
| Medición y valoración de resultados en salud basados en preferencias | 12 | Si corresponde, describa la población y los métodos utilizados para obtener las preferencias para cada resultado en salud. |  |
| Estimación del uso de recursos y costes | 13a | *Evaluaciones económicas basadas en un estudio único:* describa los enfoques utilizados para estimar el uso de recursos asociado a cada alternativa. Describa los métodos de investigación primaria o secundaria para valorar cada ítem de recurso en términos de su coste unitario. Describa cualquier ajuste utilizado para aproximarse a los costes de oportunidad. |  |
|  | 13b | *Evaluaciones económicas basadas en modelos:* describa los enfoques y las fuentes de datos utilizados para estimar el uso de recursos asociados a los estados de salud del modelo. Describa los métodos de investigación primaria o secundaria para valuar cada ítem de recurso en términos de su coste unitario. Describa cualquier ajuste utilizado para aproximarse a los costes de oportunidad. |  |
| Moneda, fecha de costes y conversión | 14 | Presente las fechas correspondientes a la estimación de las cantidades de recursos y costes unitarios. De ser necesario, describa los métodos utilizados para ajustar los costes unitarios estimados al año de los costes presentados. Describa los métodos utilizados para convertir los costes a una moneda común y el tipo de cambio. |  |
| Elección del modelo | 15 | Si procede, describa el tipo específico de modelo de análisis de decisión utilizado y los motivos para su elección. Es altamente recomendable presentar la estructura del modelo en una figura. |  |
| Supuestos | 16 | Describa todos los supuestos estructurales o de otro tipo que sustentan el modelo de análisis de decisión. |  |
| Métodos de análisis | 17 | Describa todos los métodos de análisis que dan apoyo a la evaluación. Esto puede incluir métodos para hacer frente a datos asimétricos, faltantes o censurados; métodos de extrapolación; métodos para sintetizar datos; enfoques utilizados para validar o realizar ajustes (como las correcciones de mitad de ciclo) en un modelo; y métodos para manejar la heterogeneidad poblacional y la incertidumbre. |  |
| **Resultados** |  |  |  |
| Parámetros del estudio | 18 | Presente los valores, rangos, referencias y, si se utilizaron, las distribuciones de probabilidad de todos los parámetros. Reporte los motivos o las fuentes de las distribuciones utilizadas para representar la incertidumbre cuando sea apropiado. Se recomienda fuertemente proveer una tabla que muestre los valores. |  |
| Costes y resultados incrementales | 19 | Para cada intervención, presente los valores promedio de las principales categorías de costes y resultados en salud de interés, así como las diferencias medias entre los grupos comparados. Si es aplicable, presente las razones de coste-efectividad incrementales. |  |
| Caracterizando la incertidumbre | 20a | *Evaluaciones económicas basadas en un estudio único:* describa los efectos de la incertidumbre muestral para los parámetros estimados de coste y efectividad incremental, así como el impacto de los supuestos metodológicos (como la tasa de descuento o la perspectiva del estudio). |  |
|  | 20b | *Evaluaciones económicas basadas en un modelo:*describa los efectos en los resultados de la incertidumbre para todos los parámetros, y la incertidumbre relacionada con la estructura del modelo y los supuestos. |  |
| Caracterizando la heterogeneidad | 21 | Si corresponde, presente las diferencias en costes, resultados en salud o coste-efectividad que pueden ser explicadas por variaciones entre subgrupos de pacientes con diferentes características basales u otra variabilidad observada en los efectos que no puede reducirse con más información. |  |
| **Discusión** |  |  |  |
| Hallazgos del estudio, limitaciones, generalizabilidad y conocimientos actuales | 22 | Resuma los hallazgos principales del estudio y describa cómo dan soporte a las conclusiones. Discuta las limitaciones y la generalizabilidad de los hallazgos y cómo estos se ajustan a los conocimientos actuales. |  |
| **Otros** |  |  |  |
| Fuente de financiación | 23 | Describa cómo fue financiado el estudio y el papel del financiador en la identificación, el diseño, la conducción y la presentación del análisis. Describa otras fuentes de apoyo no monetario. |  |
| Conflictos de intereses | 24 | Describa cualquier conflicto de intereses potencial de los participantes del estudio, de acuerdo con la política de la publicación científica. Ante la ausencia de una política de la publicación científica, se recomienda seguir las recomendaciones del Comité Internacional de Editores de Publicaciones Médicas (ICMJE). |  |

Nota: a partir de la versión traducida por Augustovski F, et al. Referencia: Augustovski F, García Martí S, Pichon-Riviere A. Estándares consolidados de reporte de evaluaciones económicas sanitarias: versión en español de la lista de comprobación CHEERS. Value Health Reg Issues. 2013;2:338-41.

Referencia: Husereau D, Drummond M, Petrou S, Carswell C, Moher D, Greenberg D, Augustovski F, Briggs AH, Mauskopf J, Loder E; CHEERS Task Force. Consolidated Health Economic Evaluation Reporting Standards (CHEERS) statement. BMJ. 2013;346:f1049. doi: 10.1136/bmj.f1049.
